# Supplementary material for: The evolution, impact and properties of exonic splice enhancers
Source: PubMed Central journal article supplement (PMC4054783; doi:10.1186/gb-2013-14-12-r143), 2013-12-20

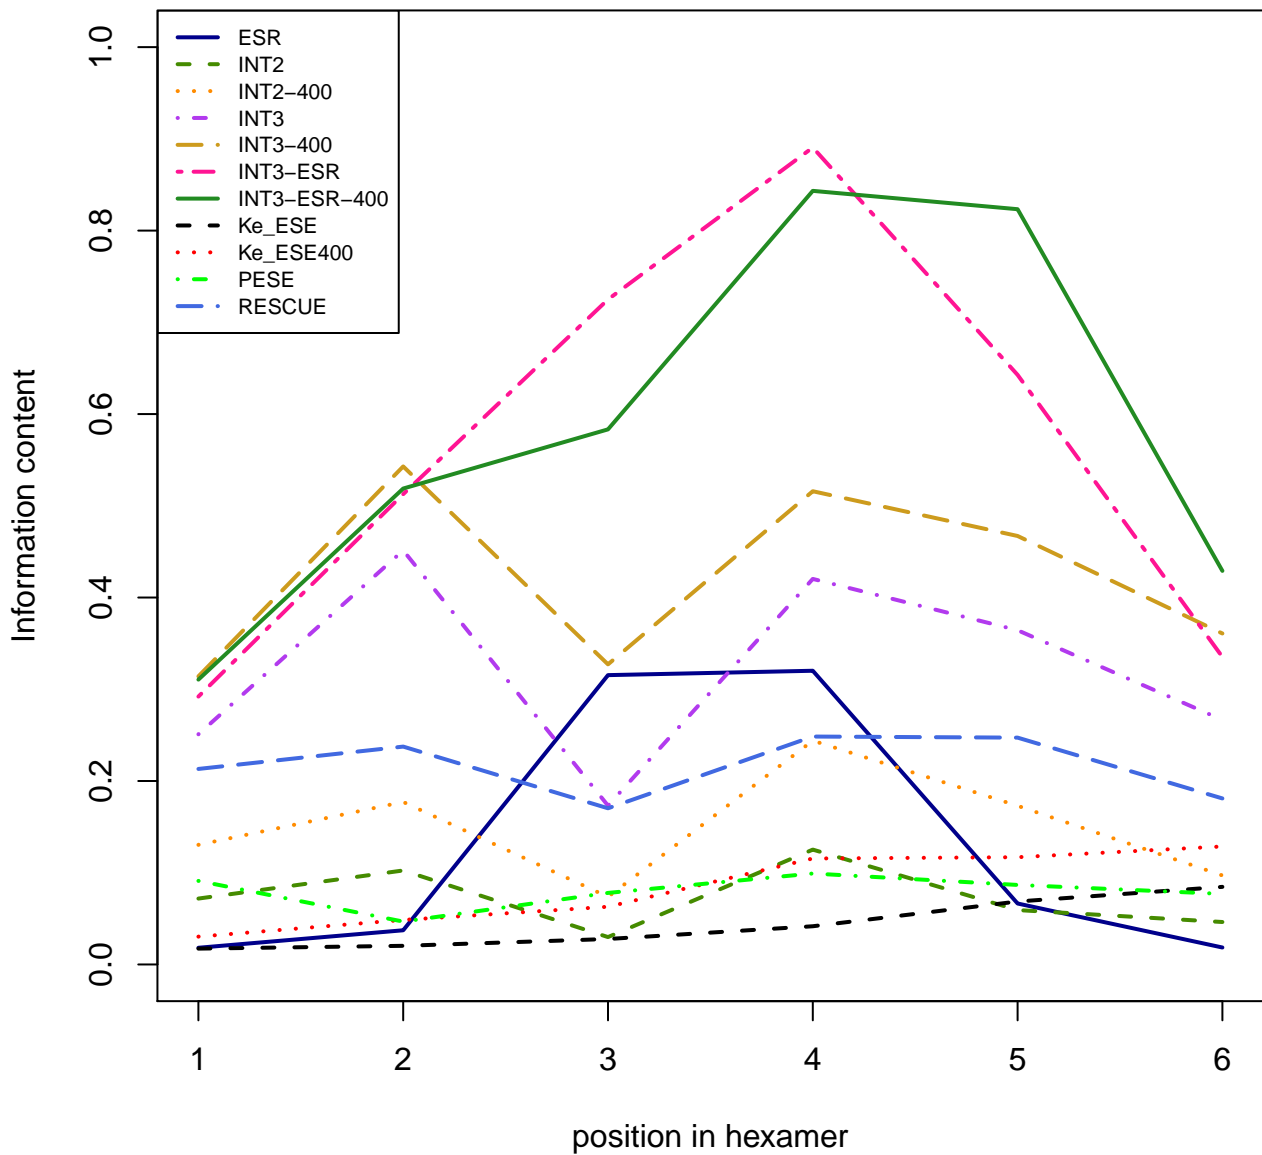

Supplement: gb-2013-14-12-r143-S7.pdf [file gb-2013-14-12-r143-S7.pdf]
